# Supplementary material for: Beneficial Interactive Effects Provided by an Arbuscular Mycorrhizal Fungi and Yeast on the Growth of Oenothera picensis Established on Cu Mine Tailings
Source: MDPI journal article supplement (doi:10.3390/plants12234012), 2023-11-29
Supplement: s1 [file s1]

**Supplementary Table S1.** Probability (p) values for the main effects and interaction for the variables measured and analyzed by means of a two-way ANOVA.

| <b>Variables</b>       | <b>AMF</b> | <b>Yeast</b> | <b>AMFxYeast</b> |
|------------------------|------------|--------------|------------------|
| Shot dry weight        | .6186      | .0056        | .0001            |
| Root dry weight        | .0110      | .0022        | .0081            |
| Chlorophyll A          | .0000      | .0000        | .0000            |
| Chlorophyll B          | .0000      | .0000        | .0000            |
| Carotenoids            | .0000      | .0000        | .0000            |
| Total Cu               | .7054      | .0002        | .4855            |
| DTPA-extractable Cu    | .0000      | .0000        | .0347            |
| Shoot Cu concentration | .3051      | .0050        | .6465            |
| Root Cu concentration  | .0445      | .4321        | .1652            |
| Translocation factor   | .0156      | .2588        | .0500            |
| Superoxide dismutase   | .5912      | .0441        | .0189            |
| Catalase               | .5675      | .0026        | .1035            |
| Ascorbate peroxidase   | .1524      | .1813        | .0116            |
| Shoot total phenols    | .2525      | .0437        | .1561            |
| Shoot DPPH             | .0698      | .0000        | .0000            |
| Shoot Cuprac           | .1436      | .0188        | .2536            |
| Shoot ABTS             | .0019      | .1515        | .0000            |
| Root total phenols     | .3661      | .0011        | .0001            |
| Root DPPH              | .9972      | .0279        | .0307            |
| Root Cuprac            | .7106      | .0026        | .0668            |
| Root ABTS              | .8130      | .0089        | .0152            |
